# Supplementary material
Source: PubMed Central journal article supplement (PMC2924083)
Supplement: supp_M110.125112_Suppl_data_31032010.pdf [file supp_M110.125112_Suppl_data_31032010.pdf]

**CRYSTAL STRUCTURES OF ETHANOLAMINE AMMONIA-LYASE COMPLEXED WITH  
COENZYME B<sub>12</sub> ANALOGS AND SUBSTRATES\***

**Naoki Shibata<sup>‡§1</sup>, Hiroko Tamagaki<sup>‡</sup>, Naoki Hieda<sup>¶</sup>, Keita Akita<sup>¶</sup>, Hirofumi Komori<sup>‡</sup>, Yasuhito  
Shomura<sup>‡</sup>, Shin-ichi Terawaki<sup>‡</sup>, Koichi Mori<sup>¶</sup>, Noritake Yasuoka<sup>‡</sup>, Yoshiaki Higuchi<sup>‡§</sup>, and Tetsuo  
Toraya<sup>¶2</sup>**

From <sup>‡</sup>Department of Life Science, Graduate School of Life Science, University of Hyogo, 3-2-1 Koto,  
Kamigori-cho, Ako-gun, Hyogo 678-1297, Japan, <sup>§</sup>RIKEN Harima Institute, SPring-8 Center, Hyogo  
679-5148, and <sup>¶</sup>Department of Bioscience and Biotechnology, Graduate School of Natural Science and  
Technology, Okayama University, Tsushima-naka, Okayama 700-8530, Japan

Supplemental Table S1. Summary of x-ray data collection, phasing and refinement statistics.

|                                      | CN-Cbl/EA                        |                                | AdePeCbl/EA                      | CN-Cbl/PA                        | CN-Cbl (sub.-free)               |
|--------------------------------------|----------------------------------|--------------------------------|----------------------------------|----------------------------------|----------------------------------|
|                                      | Native                           | Co-SAD                         | Native                           | Native                           | Native                           |
| <b>Data collection</b>               |                                  |                                |                                  |                                  |                                  |
| Beamline                             | BL38B1, SPring-8                 | BL38B1, SPring-8               | BL-17A, Photon<br>Factory        | BL38B1, SPring-8                 | BL41XU, SPring-8                 |
| Space group                          | $P6_3$                           | $P6_3$                         | $P6_3$                           | $P6_3$                           | $P6_3$                           |
| Unit-cell parameters<br>(Å)          | $a = b = 242.76,$<br>$c = 76.46$ | $a = b = 242.7,$<br>$c = 76.6$ | $a = b = 242.73,$<br>$c = 76.66$ | $a = b = 241.87,$<br>$c = 76.29$ | $a = b = 244.12,$<br>$c = 77.15$ |
| Wavelength (Å)                       | 1.0000                           | 1.6000                         | 1.0000                           | 1.0000                           | 1.0000                           |
| Resolution range (Å)                 | 50–2.10 (2.15–2.10)              | 50–2.80 (2.90–2.80)            | 50–2.25 (2.30–2.25)              | 50–2.05 (2.10–2.05)              | 50–2.10 (2.15–2.10)              |
| Measured reflections                 | 988,418                          | 236,885                        | 1,150,997                        | 818,215                          | 455,868                          |
| Unique reflections                   | 145,836 (9,228)                  | 98,735 (4,540)                 | 120,002 (6,841)                  | 158,931 (10,007)                 | 144,730 (9,260)                  |
| Completeness (%)                     | 97.2 (93.1)                      | 79.6 (36.6)                    | 98.3 (85.0)                      | 99.5 (94.6)                      | 94.6 (91.1)                      |
| $R_{\text{merge}}$                   | 0.096 (0.413)                    | 0.114 (0.390)                  | 0.101 (0.516)                    | 0.079 (0.463)                    | 0.078 (0.299)                    |
| Multiplicity                         | 6.8 (6.3)                        | 2.6 (1.3)                      | 9.6 (4.4)                        | 5.2 (3.4)                        | 3.3 (2.6)                        |
| $I/\sigma(I)$                        | 17.9 (4.35)                      | 6.91 (1.60)                    | 21.9 (2.47)                      | 18.9 (2.55)                      | 12.7 (3.50)                      |
| <b>SAD phasing</b>                   |                                  |                                |                                  |                                  |                                  |
| Figure of merit,<br>centric/acentric | -                                | 0.100/0.176                    | -                                | -                                | -                                |
| Phasing power                        | -                                | 0.373                          | -                                | -                                | -                                |

| Refinement                          |                     |   |                     |                     |                     |
|-------------------------------------|---------------------|---|---------------------|---------------------|---------------------|
| Resolution range (Å)                | 35–2.10 (2.15–2.10) | - | 35–2.30 (2.31–2.25) | 35–2.10 (2.10–2.05) | 35–2.10 (2.10–2.05) |
| <sup>a</sup> R <sub>work</sub>      | 0.240 (0.251)       | - | 0.214 (0.281)       | 0.230 (0.282)       | 0.248 (0.285)       |
| <sup>b</sup> R <sub>free</sub>      | 0.266 (0.292)       | - | 0.244 (0.314)       | 0.269 (0.329)       | 0.285 (0.324)       |
| R.m.s. deviations from ideal values |                     |   |                     |                     |                     |
| Bond lengths (Å)/bond               | 0.013/0.838         | - | 0.006/1.187         | 0.003/0.989         | 0.006/1.169         |
| angles (°)                          |                     |   |                     |                     |                     |
| Ramachandran plot                   |                     |   |                     |                     |                     |
| Favored (%)                         | 96.8                | - | 97.0                | 97.9                | 97.9                |
| Allowed (%)                         | 99.7                | - | 99.8                | 100.0               | 99.9                |
| Outliers                            | 4                   | - | 3                   | 0                   | 2                   |

$${}^a R_{\text{work}} = \frac{\sum_{hkl} \left| |F_{\text{obs}}| - k |F_{\text{calc}}| \right|}{\sum_{hkl} |F_{\text{obs}}|}, k: \text{scaling factor}$$

$${}^b R_{\text{free}} = \frac{\sum_{hkl} \left| |F_{\text{obs}}| - k |F_{\text{calc}}| \right|}{\sum_{hkl} |F_{\text{obs}}|}, \text{ where all reflections belong to a test set of randomly selected data.}$$

Values in parentheses are for the outer resolution shell.

## SUPPLEMENTARY FIGURE LEGENDS

Fig. S1. Initial electron density maps around the  $\beta$  subunit and CN-Cbl. *A*, SAD phasing only. *B*, MR only. *C*, Combined phases, SAD+MR. A schematic model after refinement is superimposed for each panel.

Fig. S2. Overall structure of diol dehydratase and comparison with EAL.

*A*, Overall model of diol dehydratase. One  $\alpha\beta\gamma$  unit is shown in a ribbon model and the other in a surface model. Color codes for each subunit:  $\alpha$  subunit, pink/sky blue;  $\beta$  subunit, green/khaki;  $\gamma$  subunit cyan/orange. *B*, Superimposed overall models of EAL (transparent surface model) and diol dehydratase (ribbon model/ $C\alpha$ -trace). The  $(\alpha\beta\gamma)_2$  dimer of diol dehydratase and  $(\alpha\beta)_6$  hexamer of EAL were superimposed on their  $\alpha$  subunit (A chain). The  $\alpha\beta\gamma$  unit of diol dehydratase that was used for superimposition is shown in a ribbon model and the other in a  $C\alpha$ -trace model. The  $(\alpha\beta)_2$  dimer of EAL that was used for superimposition is not shown to clarify the view. *C*, Ribbon presentation of the  $\alpha\beta\gamma$  unit of diol dehydratase.

Fig. S3. A surface model viewing the solvent-exposed site of the cobalamin molecule of the EAL/AdePeCbl/EA complex. AdePeCbl is shown as a ball-and-stick model. Color codes: pink,  $\alpha$ -subunit and cobalamin; green,  $\beta$ -subunit.

Fig. S4. Sigma-A weighted  $F_o-F_c$  electron density map at the adenine-ring binding site of the EAL/AdePeCbl/EA complex after the first refinement without the AdePe-group contoured at  $3\sigma$  level. A schematic of the final model for the AdePeCbl/EA complex is shown.

Fig. S5. Sigma-A weighted  $F_o-F_c$  electron density maps of EAL contoured at  $3\sigma$  level for substrates after the first refinement without substrate. *A*, The CN-Cbl/EA complex. *B*, The CN-Cbl/PA complex.

Fig. S6. The hydrogen bond network around Gln $\alpha$ 162.

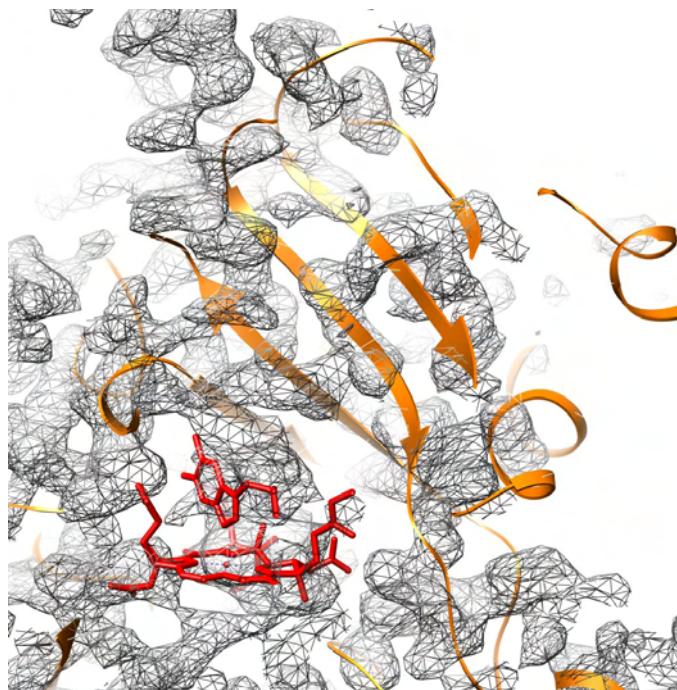

Fig. S1A

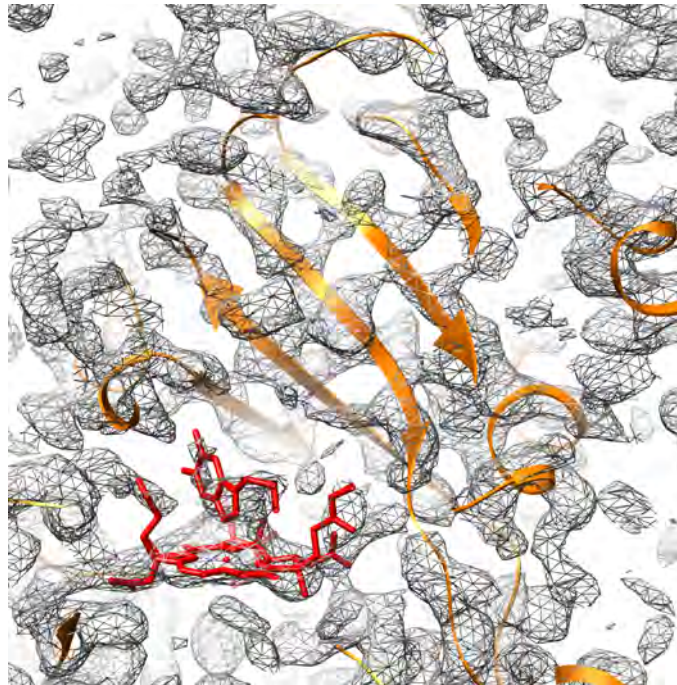

Fig. S1B

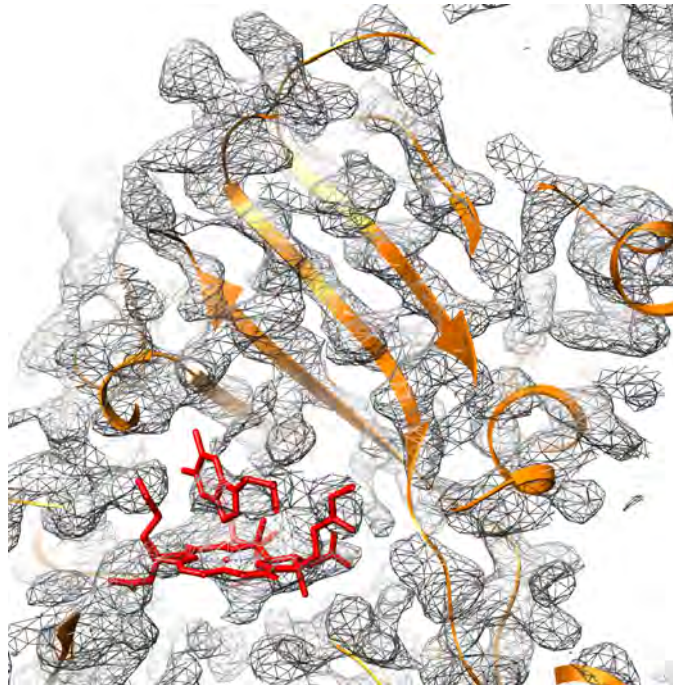

Fig. S1C

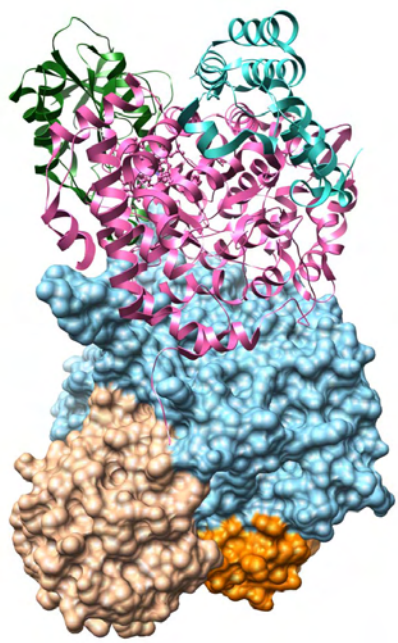

Fig. S2A



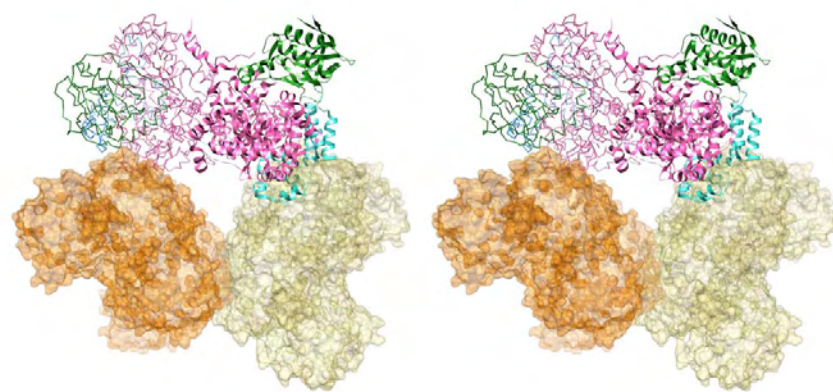

Fig. S2B

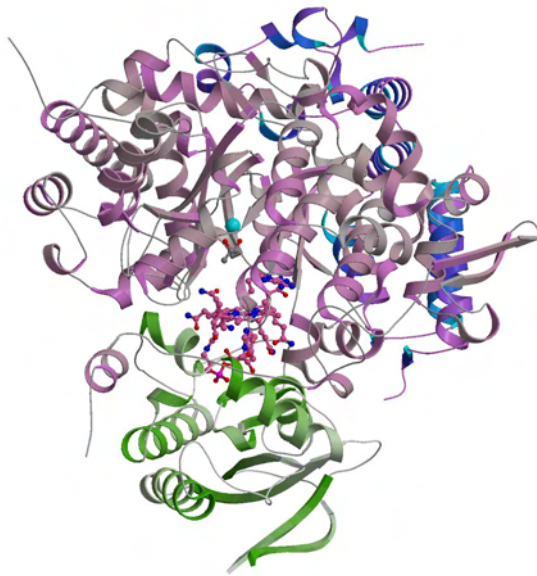

Fig. S2C

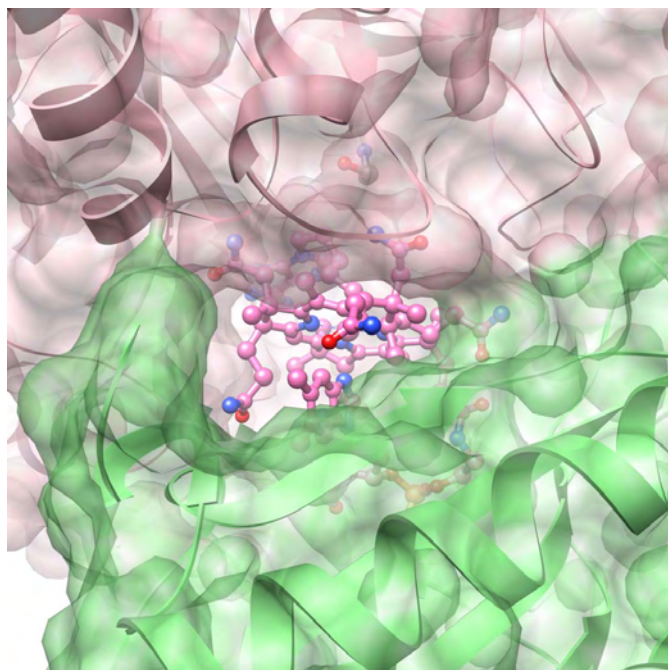

Fig. S3

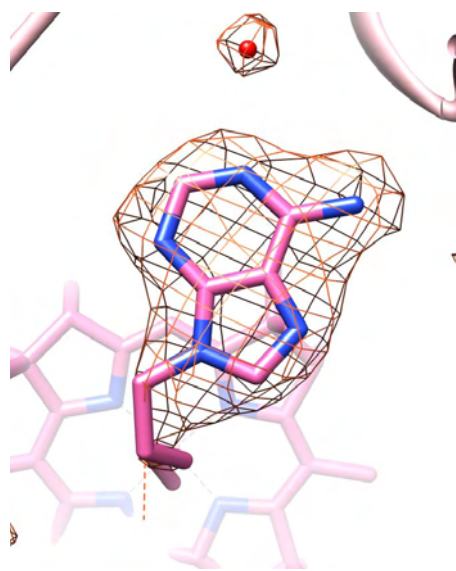

Fig. S4

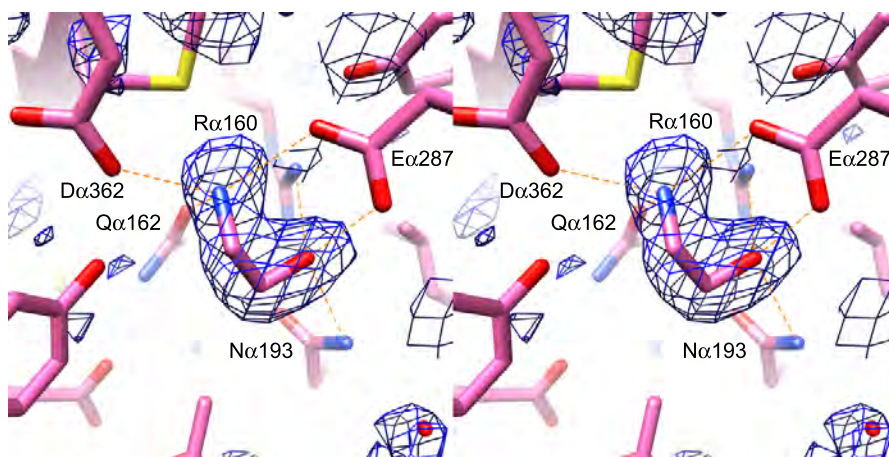

Fig. S5A

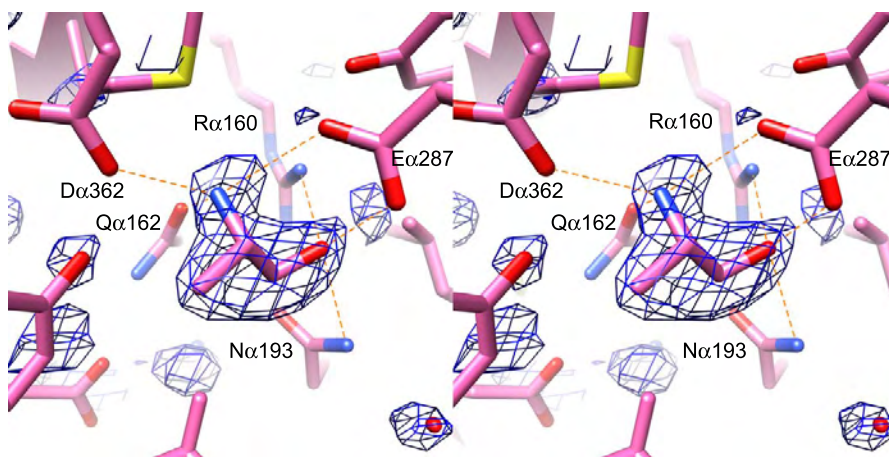

Fig. S5B

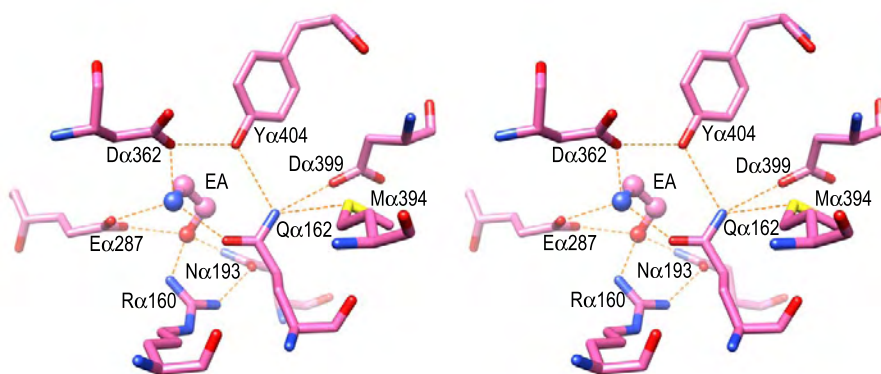

Fig. S6
